# Supplementary material for: Phosphine-free engineering toward the synthesis of metal telluride nanocrystals: the role of a Te precursor coordinated at room temperature
Source: Royal Society of Chemistry journal article supplement (doi:10.1039/c8nr07595f), 2018-01-01
Supplement: c8nr07595f1.pdf [file c8nr07595f1.pdf]

# Supporting information for

## Phosphine-free engineering toward metal telluride nanocrystals: the role of Te precursor coordinated at room temperature

Min Wu,<sup>a</sup> Yixuan Wang,<sup>a</sup> Hongyu Wang,<sup>a, b</sup> Hao Wang,<sup>b</sup> Yongming Sui,<sup>a</sup> Fei Du,<sup>c</sup> Xinyi Yang,<sup>\*,a</sup> and Bo Zou<sup>a</sup>

<sup>a</sup> State Key Laboratory of Superhard Materials, College of Physics, Jilin University, Changchun, 130012, China.

E-mail: yangxinyi@jlu.edu.cn

<sup>b</sup> School of Materials Science and Engineering, Jilin Jianzhu University, Changchun, 130118, China

<sup>c</sup> Key Laboratory of Physics and Technology for Advanced Batteries (Ministry of Education), College of Physics, Jilin University, Changchun 130012, China.

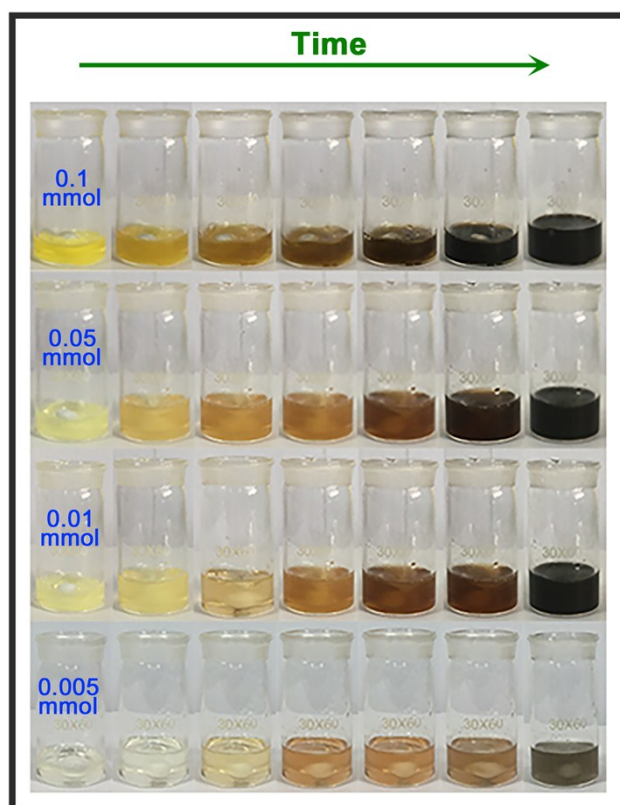

**Fig. S1** The preparation process for phosphine-free Te precursor consisting of different doses of  $\text{TeO}_2$  powder in 3.0 mL DDT and 3.0 mL OLA.

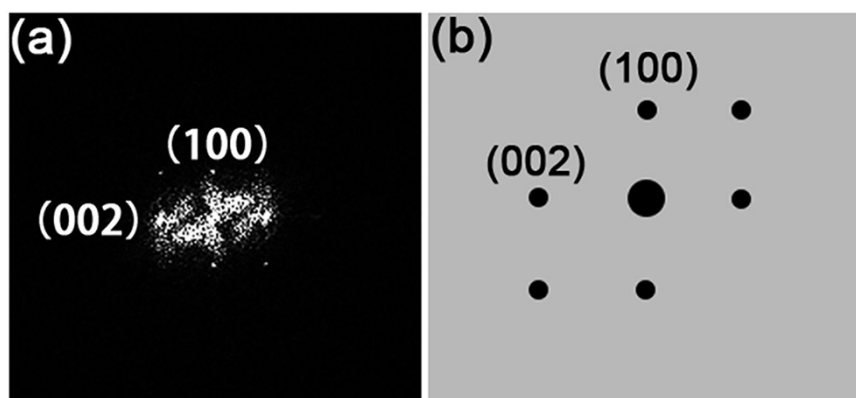

**Fig. S2** Characterization of wurtzite CdTe NCs. (a) FFT spectrum and (d) the corresponding calculated diffraction pattern.

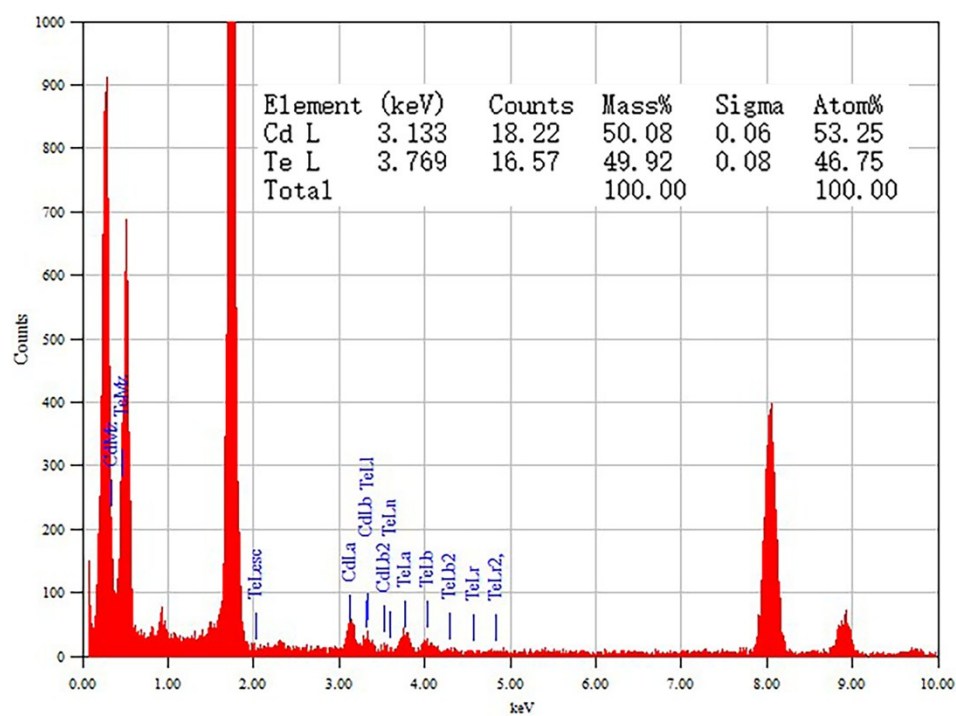

**Fig. S3** EDX spectrum of the as-prepared CdTe NCs.

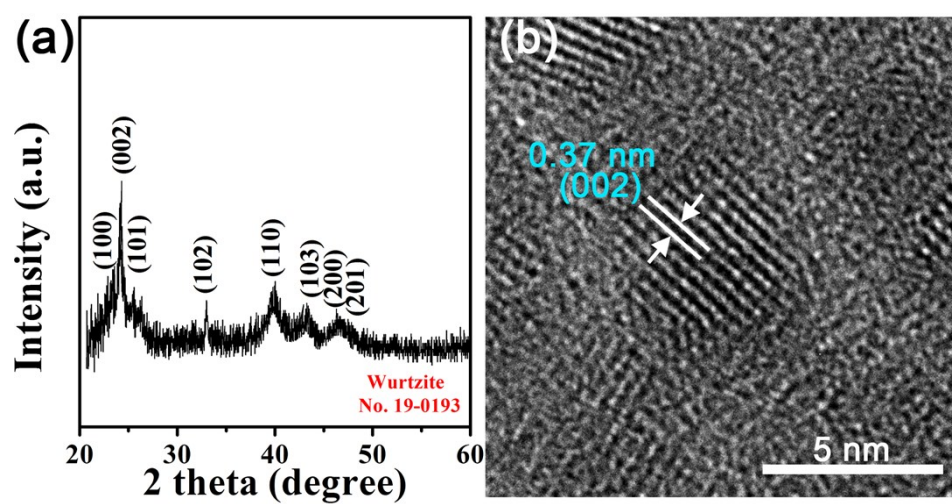

**Fig. S4** (a)HRTEM images and (b) XRD pattern of the CdTe NCs obtained at 220 °C after 30 min.

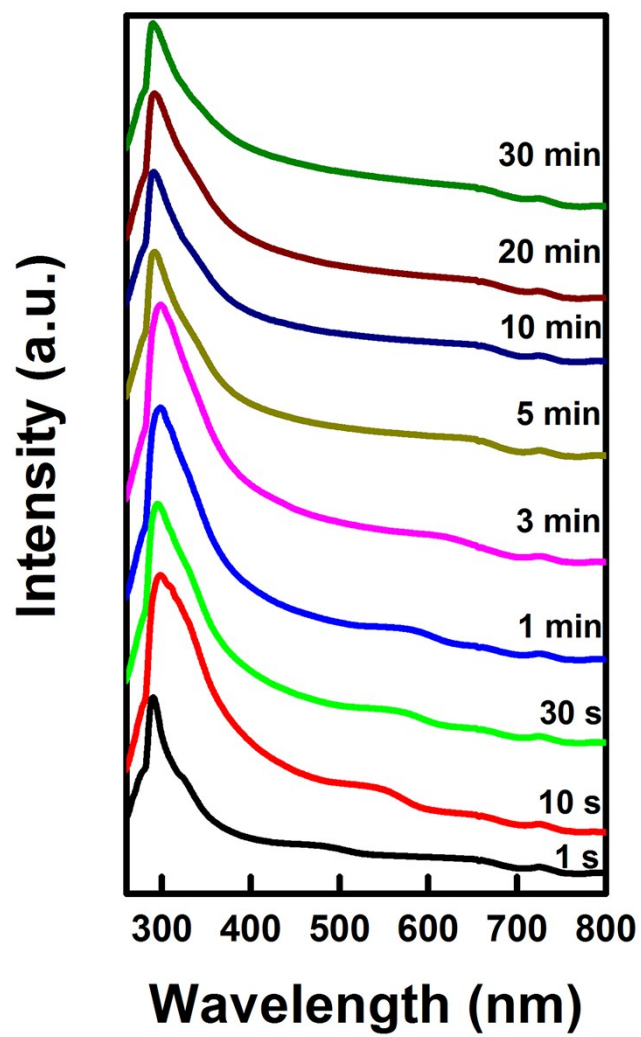

**Fig. S5** UV-vis absorption spectra of CdTe NCs with the different reaction growth time.

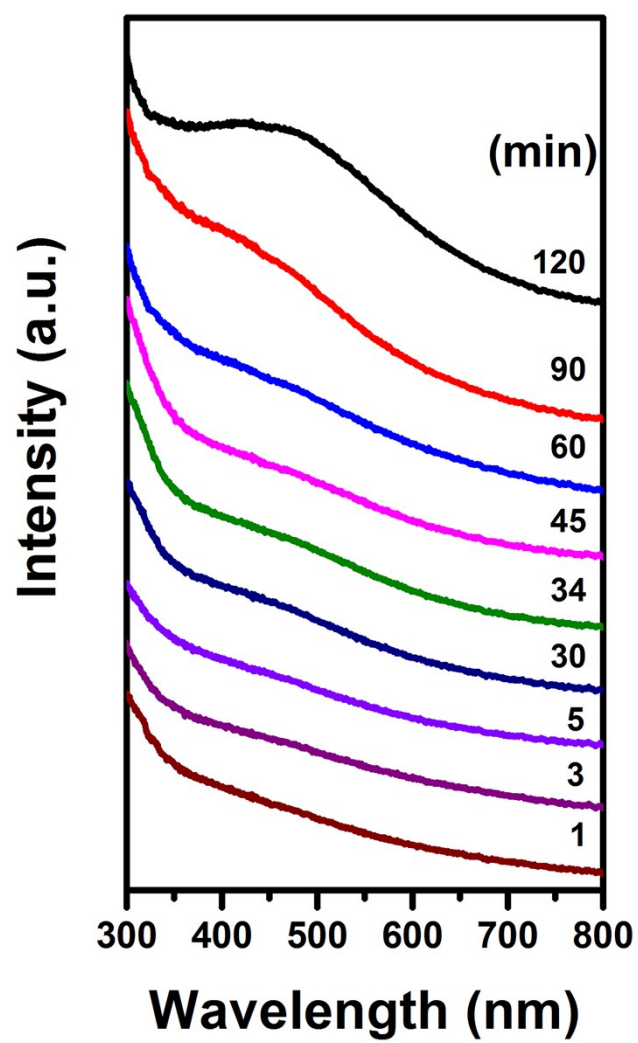

**Fig. S6** UV-vis absorption spectra of Cu<sub>2</sub>Te NCs with the different reaction growth time.
